# Supplementary material
Source: publisher figshare collection journal article supplement (https://springernature.figshare.com/ndownloader/files/21105678)

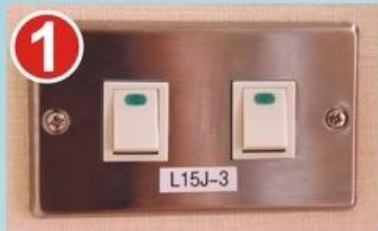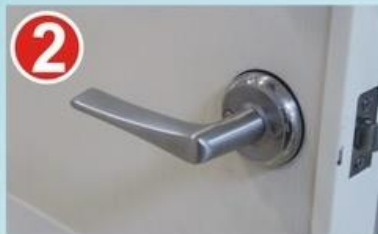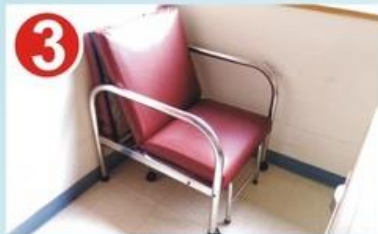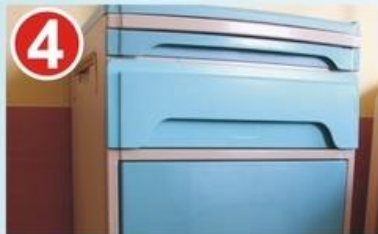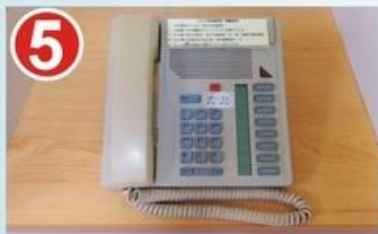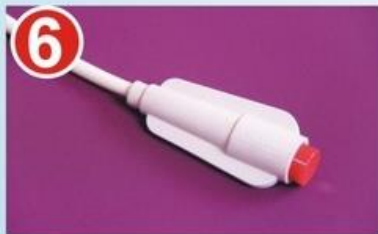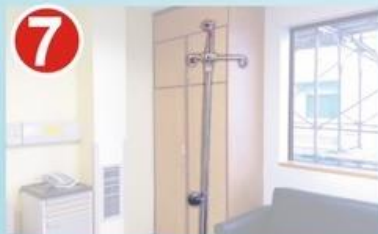

7\*H27CM

DATE

|  |  |  |
|--|--|--|
|  |  |  |
|--|--|--|

Room No. of First terminal Cleaning

|  |
|--|
|  |
|--|

|              |  |                     |  |
|--------------|--|---------------------|--|
| 1            |  | 8                   |  |
| light switch |  | bed rail            |  |
| 2            |  | 9                   |  |
| door knob    |  | control panel       |  |
| 3            |  | 10                  |  |
| chair        |  | overbed table       |  |
| 4            |  | 11                  |  |
| table handle |  | monitor panel       |  |
| 5            |  | 12                  |  |
| telephone    |  | ECG lead machine    |  |
| 6            |  | 13                  |  |
| nursing call |  | suction controller  |  |
| 7            |  | 14                  |  |
| IV pole      |  | toilet seat/ handle |  |

Terminal cleaning record

|  |
|--|
|  |
|--|

Signature

|  |
|--|
|  |
|--|

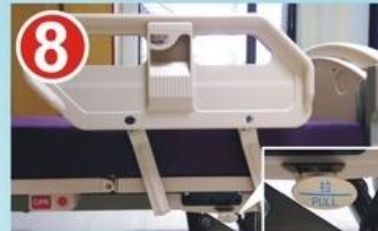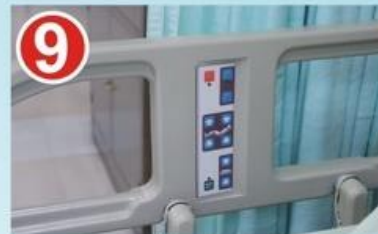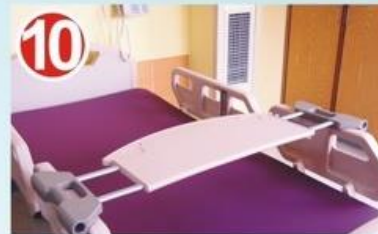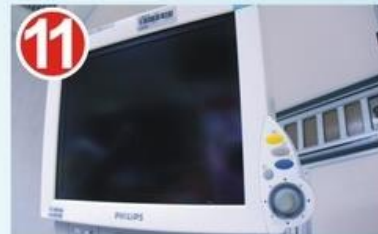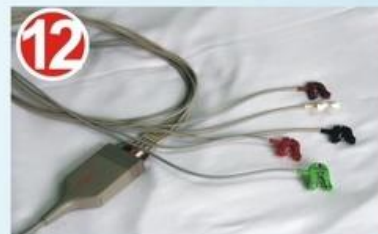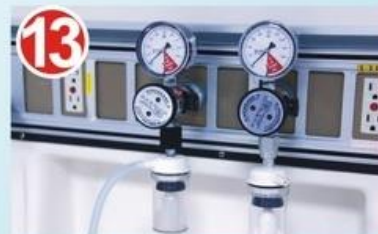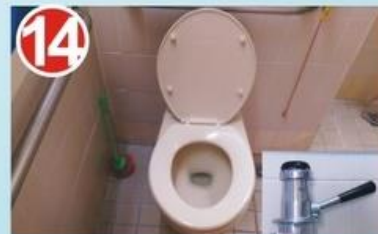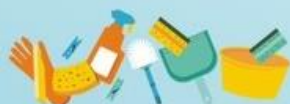

Checklist for Terminal Cleaning

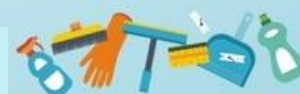

Supplement: Supplementary file [file 21105678]
